# Supplementary material
Source: publisher site journal article supplement (https://www.dovepress.com/article/241553)
Supplement: Supplementary file 1 [file get_supplementary_file.php]

**Appendix 1 Pearson correlations between variables**

| Variables | 1 | 2 | 3 | 4 | 5 | 6 | 7 | 8 | 9 |
| --- | --- | --- | --- | --- | --- | --- | --- | --- | --- |
| 1 Certified EHRs | 1 |  |  |  |  |  |  |  |  |
| 2 System affiliation | .083** | 1 |  |  |  |  |  |  |  |
| 3 Region | 0.046 | 0.020 | 1 |  |  |  |  |  |  |
| 4 Teaching status | .170** | .088** | -.147** | 1 |  |  |  |  |  |
| 5 Location | 0.031 | .157** | -.066* | .376** | 1 |  |  |  |  |
| 6 Bed-size | .228** | .123** | -.122** | .555** | .354** | 1 |  |  |  |
| 7 Ownership | -.080** | .340** | .046 | -.120** | .112** | -.149** | 1 |  |  |
| 8 Network | .224** | .195** | -.148** | .215** | .138** | .238** | -0.012 | 1 |  |
| 9 HMO | .185** | .178** | -.135** | .234** | .250** | .231** | .107** | .207** | 1 |
| 10 PPO | .209** | .175** | -0.050 | .200** | .112** | .204** | .105** | .211** | .739** |
| Note. EHRs = electronic health records; CI = confidence interval; HMO = health maintenance organization; PPO=preferred provider organization.  ** Correlation is significant at the 0.01 level (2-tailed).  * Correlation is significant at the 0.05 level (2-ailed). | | | | | | | | | |
